# Supplementary material
Source: Research Square preprint supplement (doi:10.21203/rs.3.rs-9515031/v1)
Supplement: Supplementary file 1 [file 3e20a45a84ae0c84a33213cd.docx]

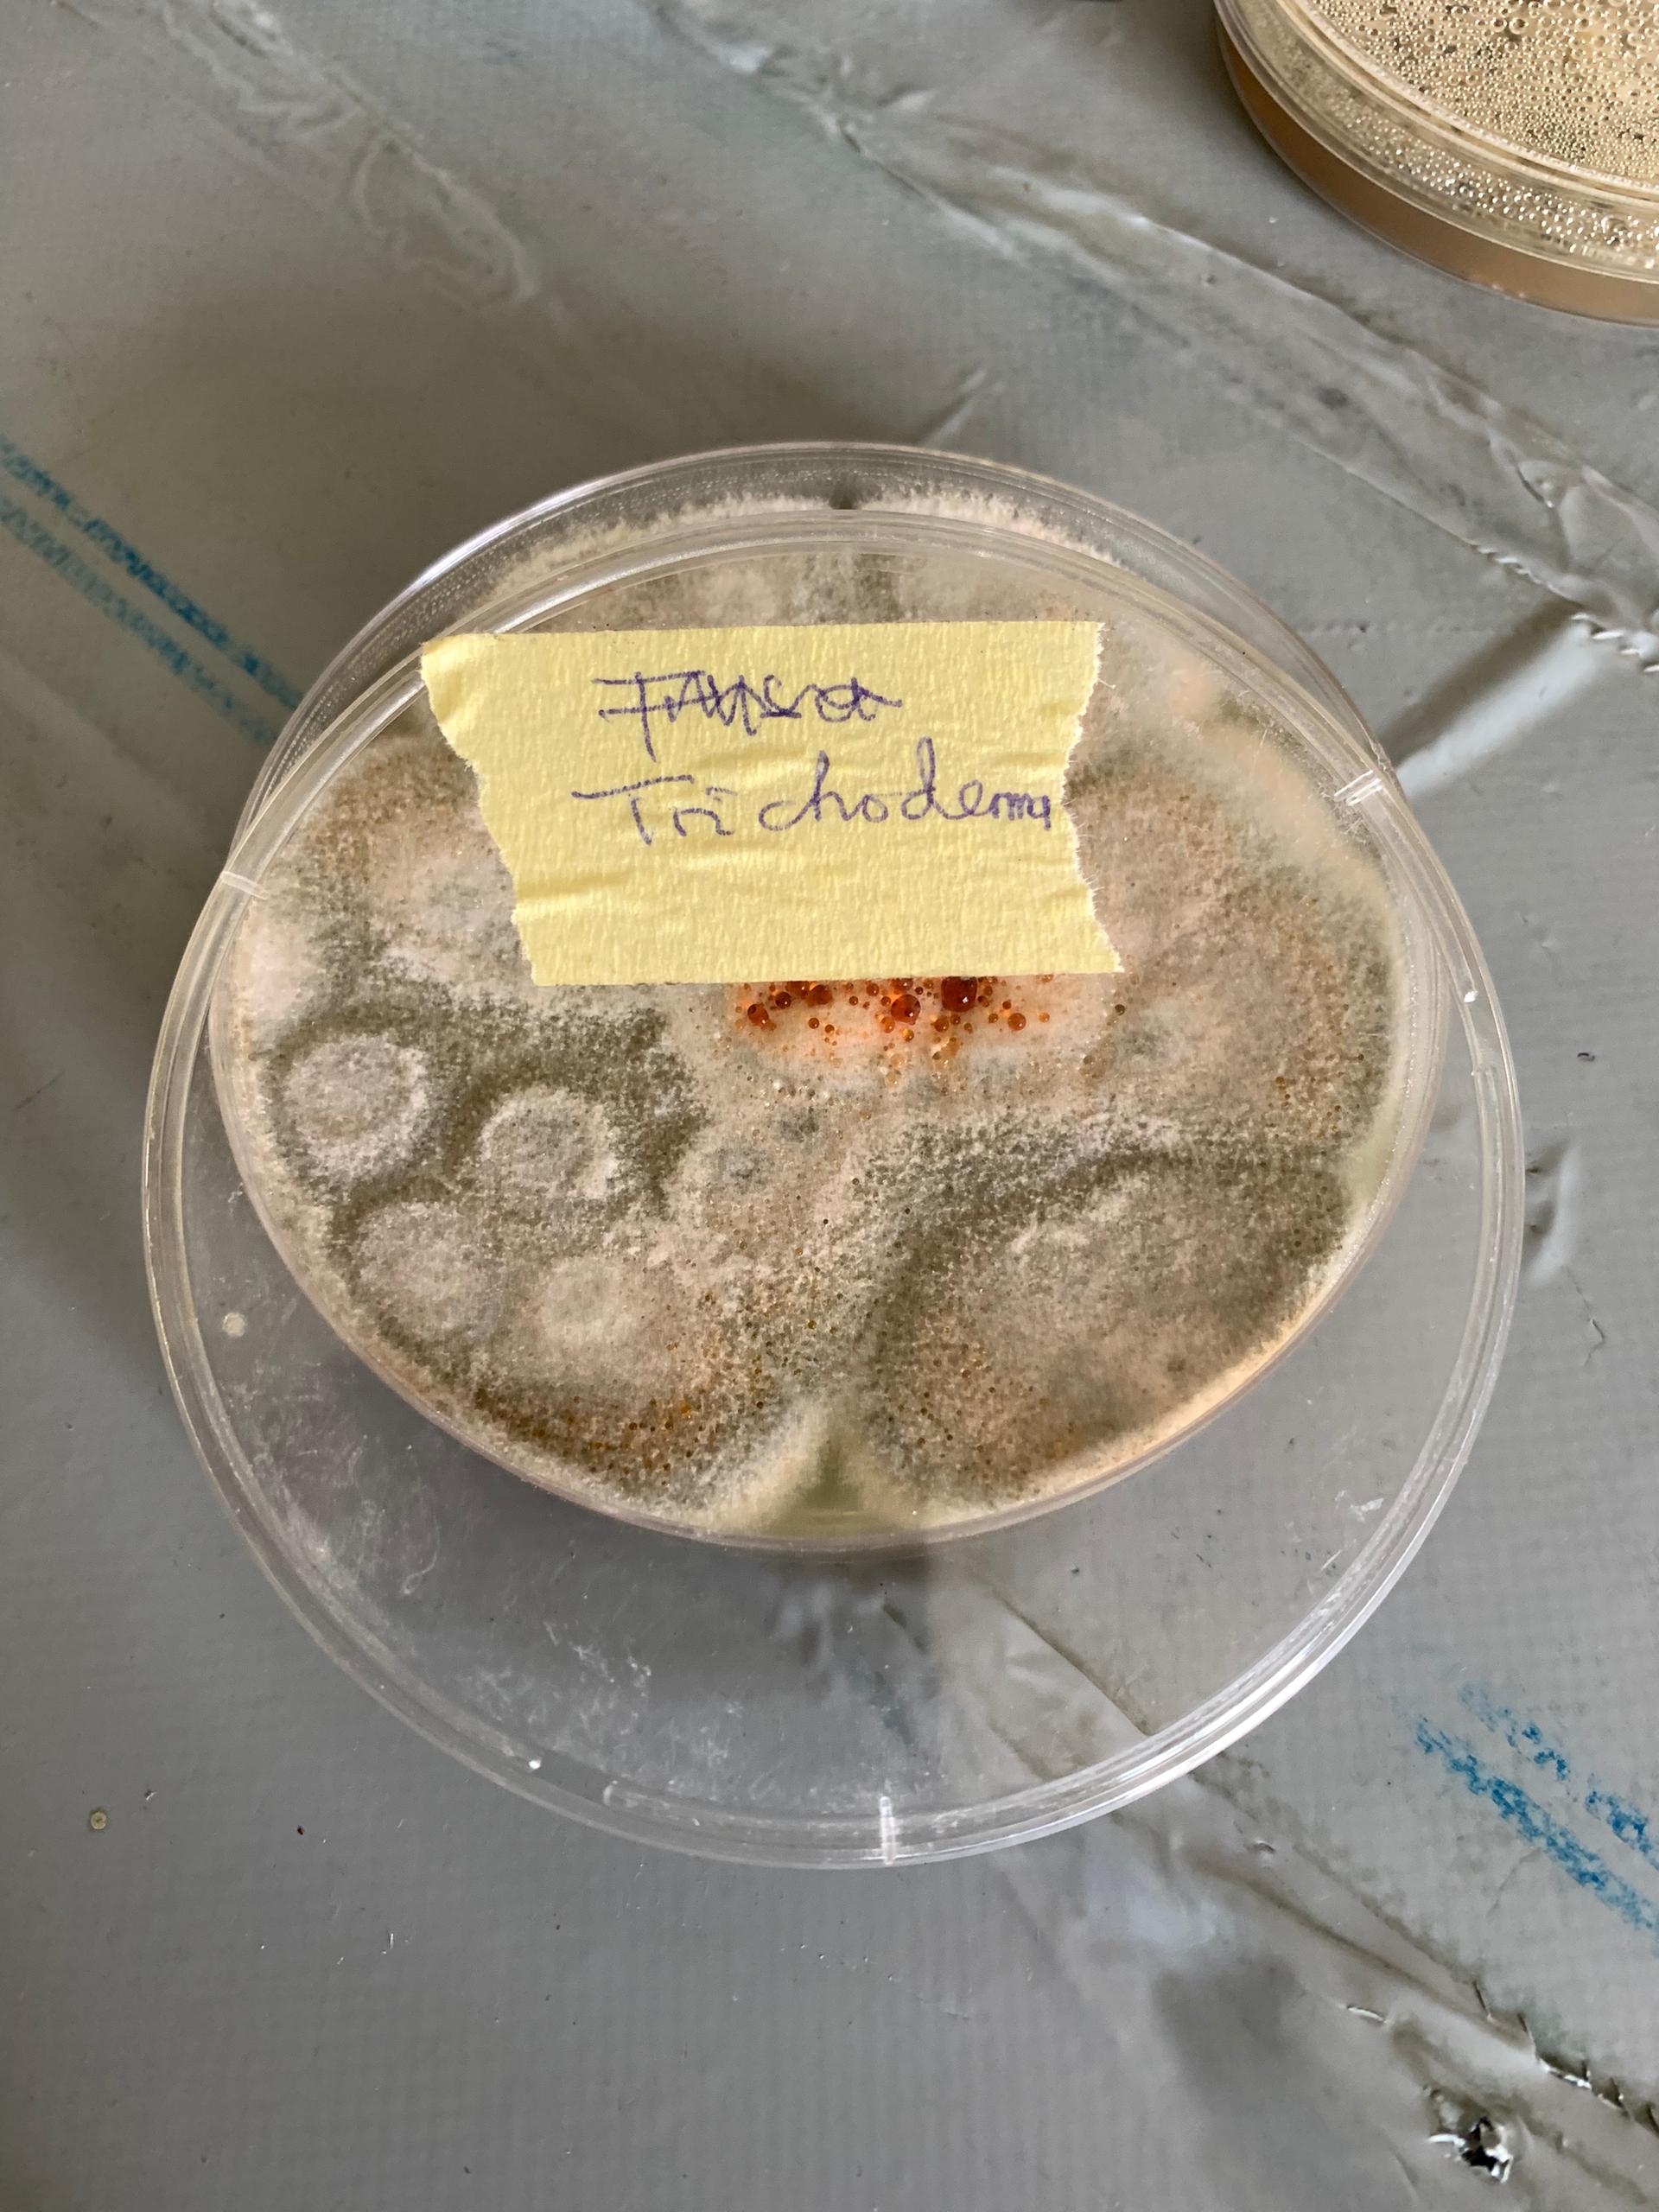


Plate 1: Dual culture interaction between Trichoderma harzianum and Fusarium oxysporum on potato dextrose agar


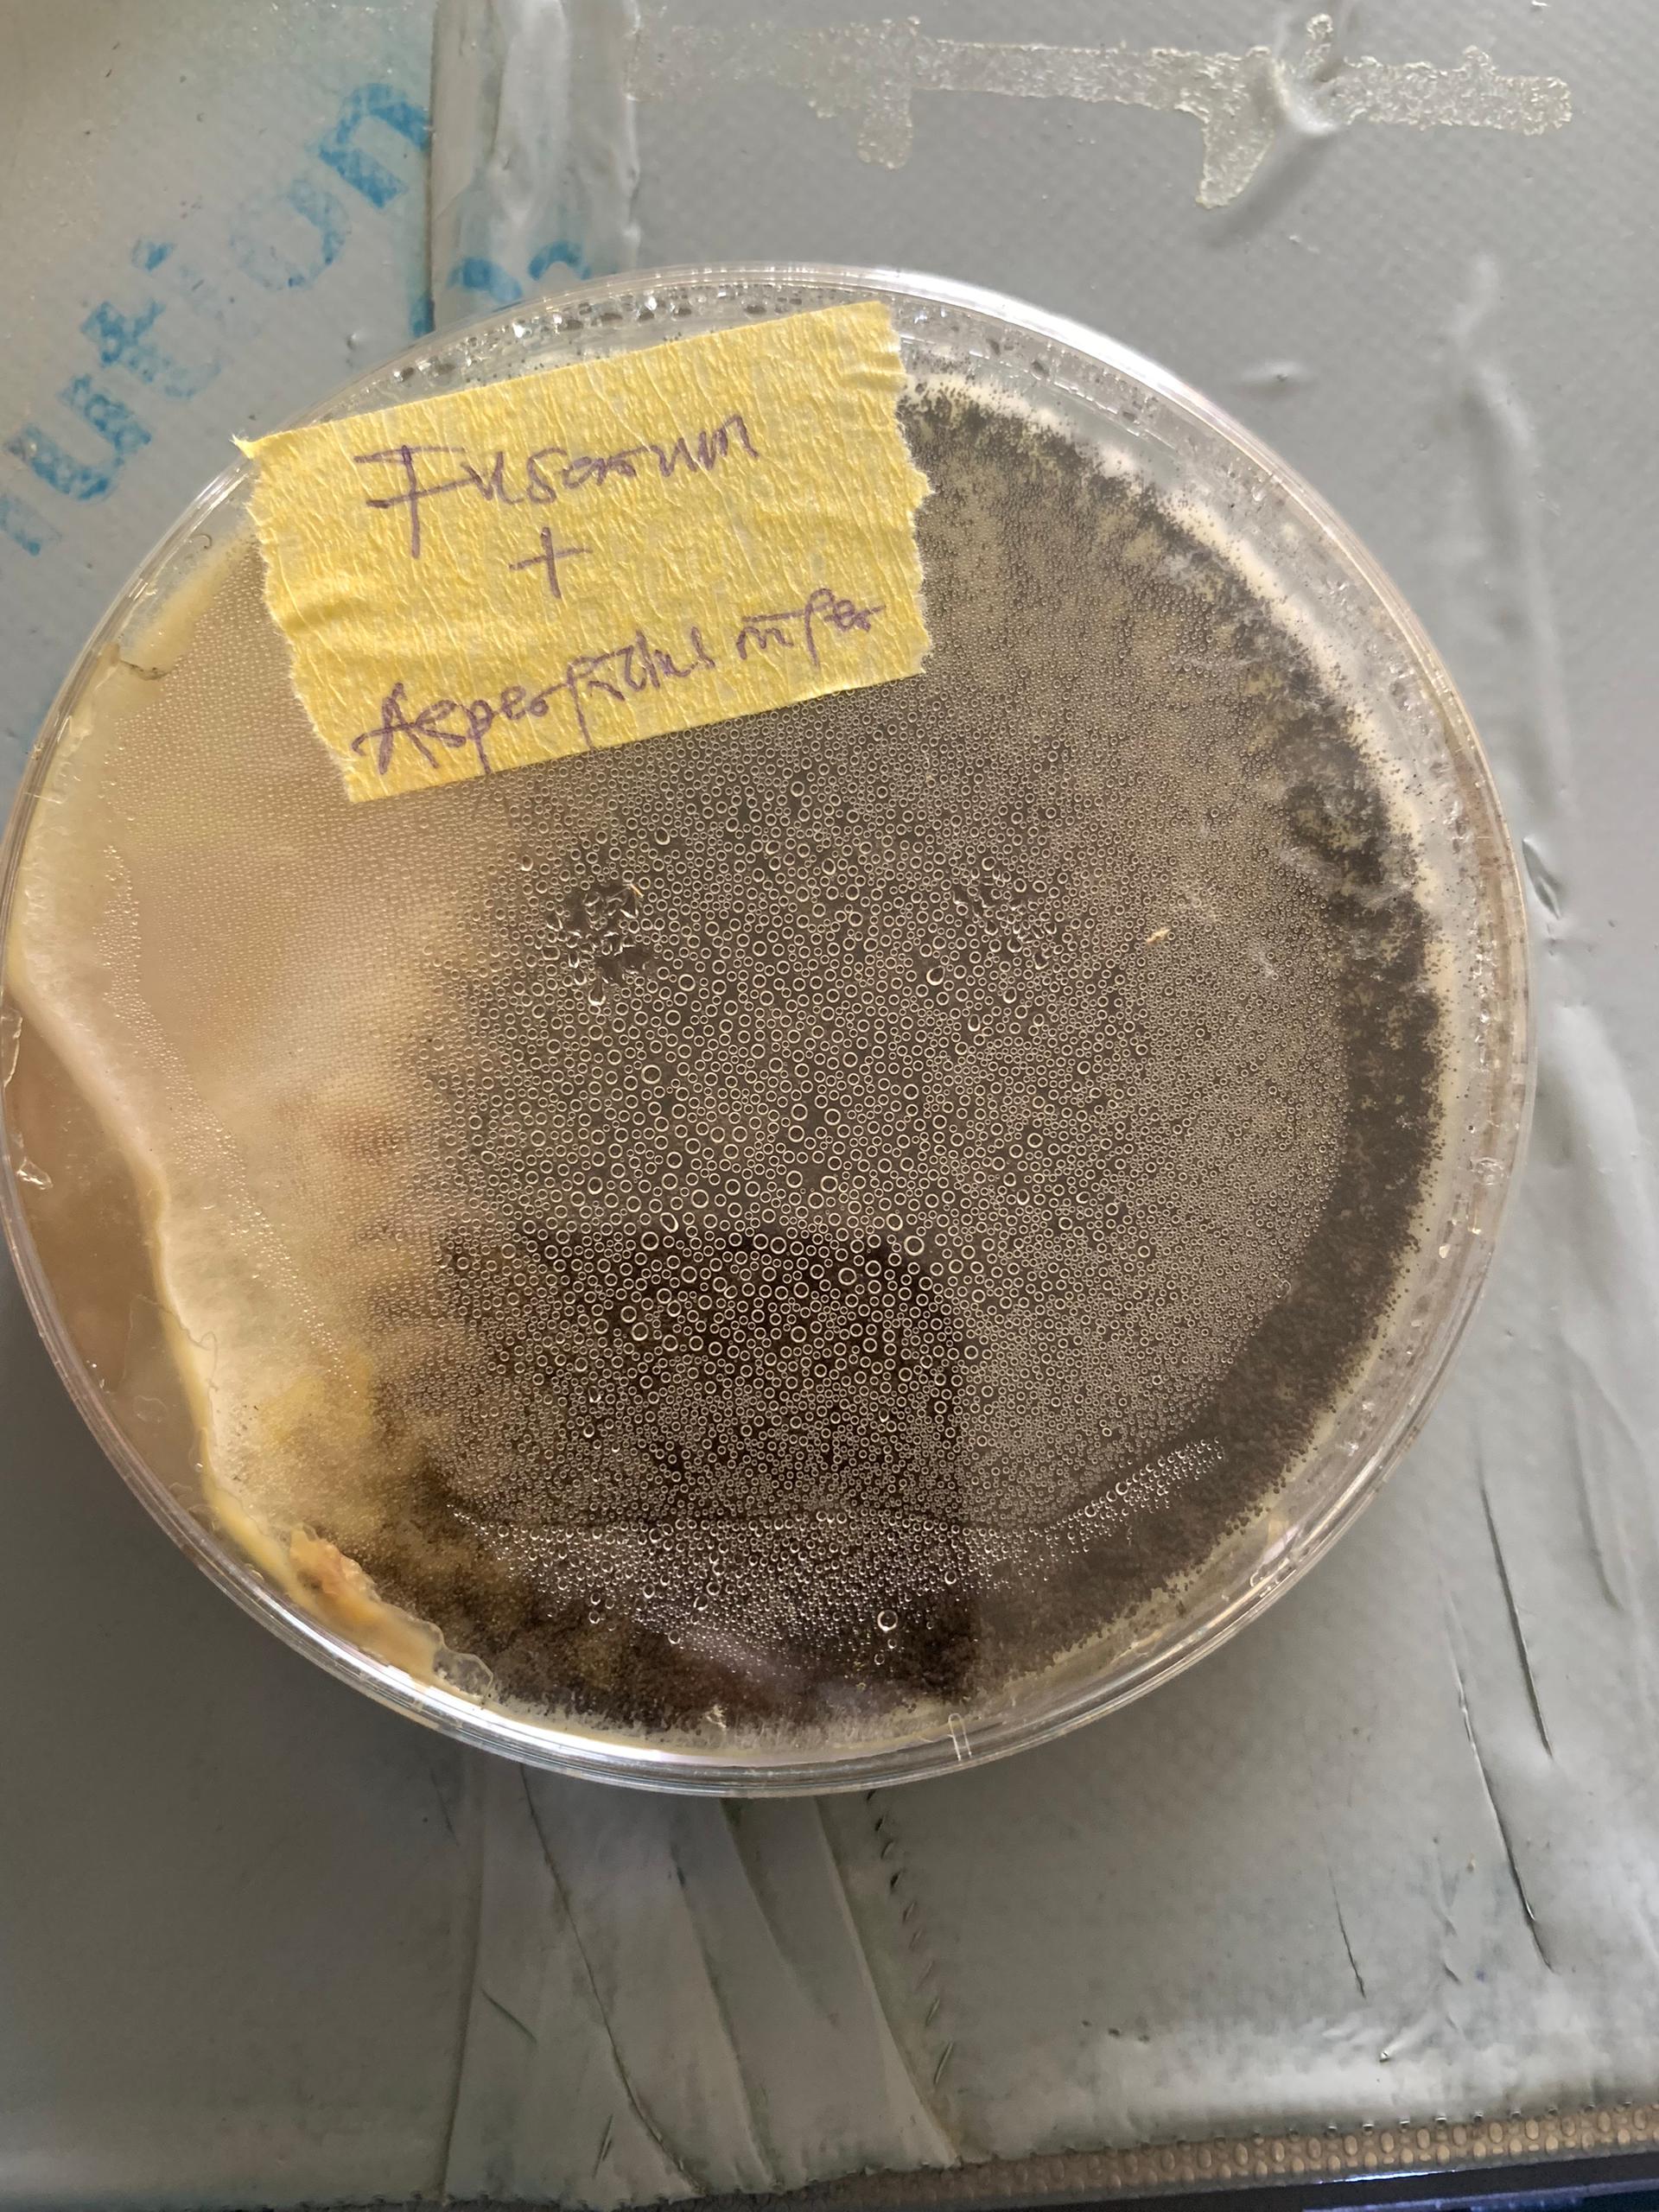


Plate 2: Dual culture interaction between Aspergillus niger and Fusarium oxysporum on potato dextrose agar


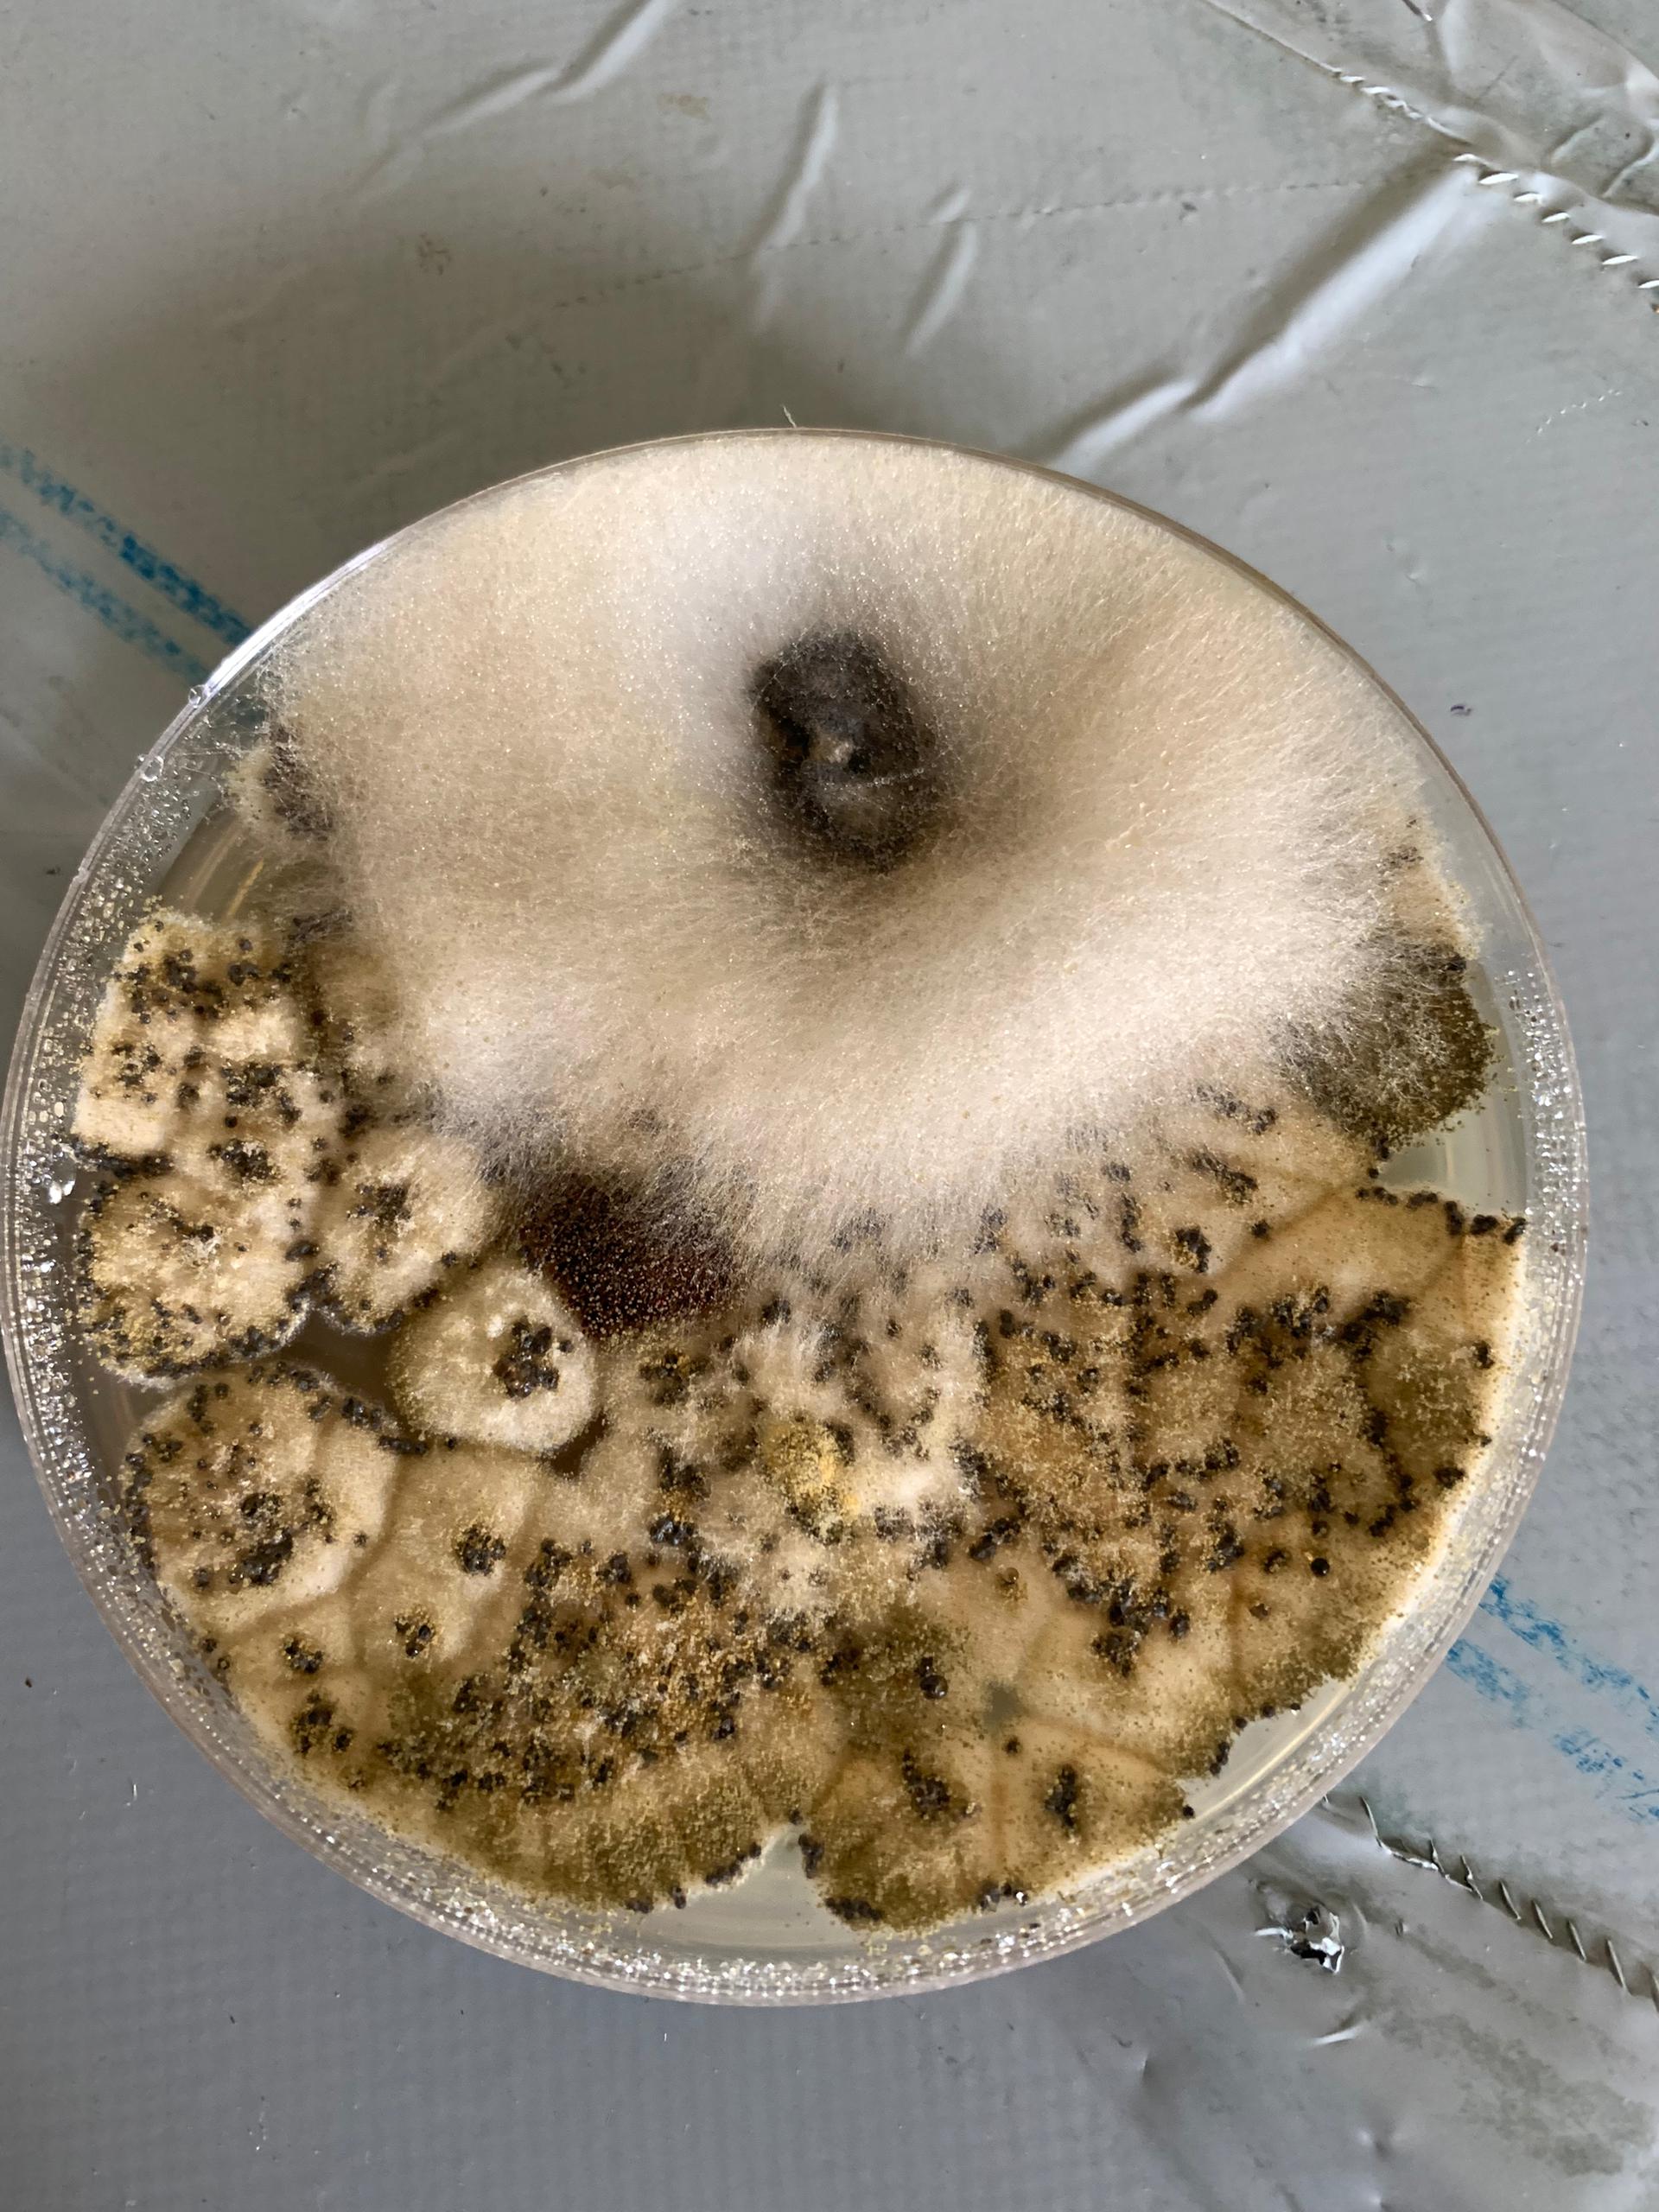


Plate 3: Dual culture interaction between Aspergillus flavus and Fusarium oxysporum on potato dextrose agar
