# Supplementary material
Source: Research Square preprint supplement (doi:10.21203/rs.3.rs-9515031/v1)

*Graphical Abstract*


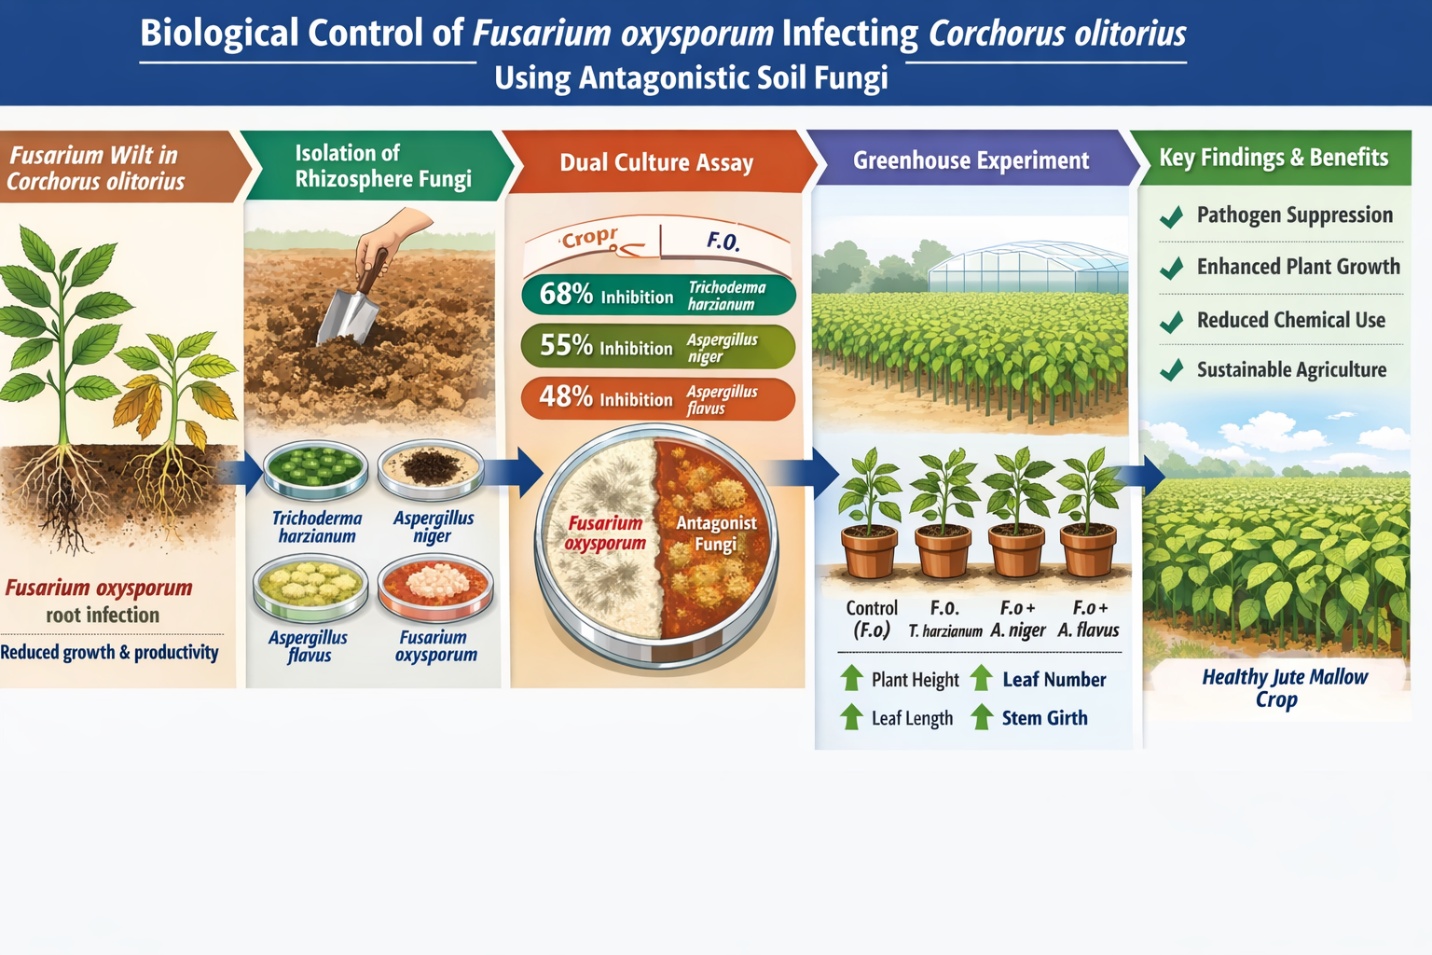

Supplement: Supplementary file 2 [file 424d922cdc62b39e3490f255.docx]
